# Supplementary material for: No Mow May lawns have higher pollinator richness and abundances: An engaged community provides floral resources for pollinators
Source: PeerJ journal article supplement (doi:10.7717/peerj.10021), 2020-09-22
Supplement: Data_S1__NoMowMay_Data.xlsx [file Data_S1__NoMowMay_Data.xlsx]

## Sheet: Summary
Date	AddressCode	lon	lat	NoMowArea	Mow_NoMow	Time	Duration	Floral_Density_1	Floral_Density_2	Floral_Density_3	Floral_Density_4	Floral_Density_5	Mean_Floral_Density	Floral_Richness	Bee_Abundance	Bee_Richness
2020-05-25	1	-88.4017	44.2642	157.32	NoMow	15:30:00	47	95	80	90	90	80	88.75	8	10	4
2020-05-25	2	-88.4007	44.2665	145.3	NoMow	15:15:00	44	5	10	3	5	75	19.6	6	5	4
2020-05-25	3	-88.3986	44.2664	190.58	NoMow	14:45:00	57	60	80	95	10	30	55	7	11	9
2020-05-25	4	-88.398	44.2634	153	NoMow	13:30:00	45	50	30	70	80	60	58	7	12	7
2020-05-25	5	-88.3978	44.2641	93	NoMow	13:55:00	28	50	60	50	15	80	51	14	7	4
2020-05-25	6	-88.3997	44.2655	150	Mow	13:00:00	45	1	5	50	5	15	15.2	4	3	3
2020-05-25	7	-88.3989	44.2642	150	Mow	13:35:00	45	1	50	40	60	50	40.2	2	2	2
2020-05-25	8	-88.4	44.2642	150	Mow	16:00:00	45	40	50	5	0	15	22	3	2	1
2020-05-26	9	-88.3857	44.2704	233.49	NoMow	14:20:00	70	10	60	50	80	90	58	12	8	6
2020-05-26	10	-88.3851	44.2681	187.92	NoMow	13:45:00	56	5	75	80	80	65	61	5	3	2
2020-05-26	11	-88.3868	44.269	271	NoMow	13:40:00	81	50	90	40	88	25	58.6	11	13	9
2020-05-26	12	-88.3873	44.2718	220	NoMow	15:40:00	66	90	40	50	25	15	44	7	4	3
2020-05-26	13	-88.3908	44.2699	206	NoMow	16:10:00	62	90	80	30	90	30	64	12	10	7
2020-05-26	14	-88.3854	44.2662	150	Mow	16:30:00	45	40	50	30	20	60	40	7	6	6
2020-05-26	15	-88.386	44.267	150	Mow	13:25:00	45	10	40	20	2	5	15.4	5	2	2
2020-05-26	16	-88.3881	44.2677	150	Mow	15:00:00	45	40	60	10	40	25	35	6	5	4
2020-05-27	17	-88.3704	44.2651	446	NoMow	09:30:00	86	70	40	20	70	50	50	10	20	10
2020-05-27	18	-88.3754	44.257	176	NoMow	11:00:00	52	15	80	90	45	70	60	5	8	4
2020-05-27	19	-88.3751	44.2623	110	NoMow	13:53:00	32	70	45	60	80	100	71	7	10	6
2020-05-27	20	-88.3813	44.2612	235.32	NoMow	14:07:00	71	5	30	40	35	25	27	8	16	10
2020-05-27	21	-88.3815	44.2583	297	NoMow	15:00:00	89	25	5	20	80	95	45	7	18	7
2020-05-27	22	-88.3815	44.2643	150	Mow	13:08:00	45	10	5	1	2	1	3.8	5	4	2
2020-05-27	23	-88.3803	44.2626	150	Mow	13:29:00	45	5	1	0	1	5	2.4	3	1	1
2020-05-27	24	-88.3782	44.2639	150	Mow	14:43:00	45	0	0	0	5	0	1	3	1	1
2020-05-27	25	-88.3784	44.2909	150	Mow	16:05:00	45	5	50	30	10	15	22	5	4	3
2020-05-27	26	-88.3744	44.29	150	Mow	16:30:00	45	5	50	10	40	40	29	5	4	2
2020-05-28	27	-88.3822	44.2909	150	Mow	16:00:00	45	5	30	0	5	0	8	2	2	2
2020-05-29	28	-88.4191	44.2569	360	NoMow	14:45:00	107	10	80	50	40	60	48	7	28	11
2020-05-29	29	-88.4229	44.2556	91	NoMow	14:30:00	27	50	100	60	50	15	55	5	11	4
2020-05-29	30	-88.4162	44.2542	168	NoMow	10:20:00	49	80	90	100	50	75	79	8	13	7
2020-05-29	31	-88.423	44.2559	201	NoMow	13:57:00	60	40	20	60	0	70	38	11	9	5
2020-05-29	32	-88.4229	44.2557	273	NoMow	11:00:00	84	50	40	60	70	35	51	14	12	7
2020-05-30	33	-88.3867	44.2901	206	NoMow	10:00:00	61	70	20	50	50	60	50	11	18	5
2020-05-30	34	-88.3878	44.2906	230	NoMow	10:15:00	69	5	20	10	15	1	10.2	4	17	4
2020-05-30	35	-88.3879	44.2885	135	NoMow	1900-05-14	40	60	80	50	50	20	52	4	25	8

## Sheet: Flowers
Address	Floral_spp	Scientific_name
1	Dandelion	Taraxacum officinale
1	Viola Sp1	Viola papillionesa
1	Creeping Charlie	Glechoma hederacea
1	Wooly Burdock	Arctium tomentosum
1	Queen Anne's Lace	Daucus carota
1	Clover- Small	Melilotus albus
1	Silverleaf	Hydrophyllum virginianum
1	jewelweed	Impatiens pallida
2	Dandelion	Taraxacum officinale
2	Viola Sp1	Viola papillionesa
2	Creeping Charlie	Glechoma hederacea
2	Plantain	Plantago major
2	Clover- Small	Melilotus albus
3	Dandelion	Taraxacum officinale
3	Viola Sp1	Viola papillionesa
3	Creeping Charlie	Glechoma hederacea
3	Queen Anne's Lace	Daucus carota
3	Clover- Small	Melilotus albus
3	Sheppards Purse	Capsella bursa-pastoris
3	Canada Thistle	Cirsium arvense
4	Dandelion	Taraxacum officinale
4	Viola Sp1	Viola papillionesa
4	Creeping Charlie	Glechoma hederacea
4	Sheppards Purse	Capsella bursa-pastoris
4	Clover- Small	Melilotus albus
4	NapatNoon	Ornithogalum ombellatum
4	Milkweed	Asclepias syriaca
5	Dandelion	Taraxacum officinale
5	Viola Sp1	Viola papillionesa
5	Creeping Charlie	Glechoma hederacea
5	Clover- Small	Melilotus albus
5	Plantain	Plantago major
5	Curly Dock	Rumex crispus
5	Sheppards Purse	Capsella bursa-pastoris
5	Chickweed	Stellaria media
6	Dandelion	Taraxacum officinale
6	Clover- Small	Melilotus albus
6	Plantain	Plantago major
6	Chickweed	Stellaria media
7	Dandelion	Taraxacum officinale
7	Clover- Small	Melilotus albus
8	Dandelion	Taraxacum officinale
8	Clover- Small	Melilotus albus
8	Plantain	Plantago major
9	Dandelion	Taraxacum officinale
9	viola Sp1	Viola papillionesa
9	Mint	Mentha canadensis
9	Clover- Small	Melilotus albus
9	Clover-Large	Melilotus officinalis
9	Sheppards Purse	Capsella bursa-pastoris
9	Large Leaf Avens	Geum macrophyllum
9	Phlolx	Phlox divaricata
9	Viola Sp.2	Viola pubescence
9	Gaultheria	Gaultheria procumbens
9	Aster	Aster sp.
9	Silverleaf	Hydrophyllum virginianum
10	Dandelion	Taraxacum officinale
10	Viola Sp1	Viola papillionesa
10	Clover- Small	Melilotus albus
10	Plantain	Plantago major
10	Praire Fleabane	Erigeron strigosus
11	Dandelion	Taraxacum officinale
11	Viola Sp1	Viola papillionesa
11	Creeping Charlie	Glechoma hederacea
11	Silverleaf	Hydrophyllum virginianum
11	Whirled Aster	Aster sp.
11	White Avens	Geum canadense
11	Sheppards Purse	Capsella bursa-pastoris
11	Plantain	Plantago major
11	Mayapple	Podophyllum peltatum
11	Clover- Small	Melilotus albus
11	Curly Dock	Rumex crispus
12	Dandelion	Taraxacum officinale
12	Viola Sp1	Viola papillionesa
12	Creeping Charlie	Glechoma hederacea
12	Plantain	Plantago major
12	Sheppards Purse	Capsella bursa-pastoris
12	Clover- Small	Melilotus albus
12	Clover-Large	Melilotus officinalis
13	Dandelion	Taraxacum officinale
13	Viola Sp1	Viola papillionesa
13	CReeping Charlie	Glechoma hederacea
13	Clover- Small	Melilotus albus
13	Clover-Large	Melilotus officinalis
13	Robin's Plantain	Erigeron pulchellus
13	PLantain	Plantago major
13	Sheppards Purse	Capsella bursa-pastoris
13	Viola Sp.2	Viola pubescence
13	Silverleaf	Hydrophyllum virginianum
13	Jewelweed	Impatiens pallida
14	Plantain	Plantago major
14	Clover- Small	Melilotus albus
14	Common selfheal	Prunella vulgaris
14	Sheppards Purse	Capsella bursa-pastoris
14	Common mouseear chickweed	Cerastium fontanum
14	Black Seed Plantain	Plantago rugelii
15	Dandelion	Taraxacum officinale
15	Clover- Small	Melilotus albus
15	common selfheal	Prunella vulgaris
15	Clover-Large	Melilotus officinalis
15	Sheppards Purse	Capsella bursa-pastoris
15	Plantain	Plantago major
16	Creeping Charlie	Glechoma hederacea
16	Dandelion	Taraxacum officinale
16	Creeping Charlie	Glechoma hederacea
16	Clover- Small	Melilotus albus
16	Sheppards Purse	Capsella bursa-pastoris
16	Plantain	Plantago major
16	Chickweed	Stellaria media
16	Burgemont	Monarda fistulosa
17	Dandelion	Taraxacum officinale
17	Viola Sp1	Viola papillionesa
17	Clover- Small	Melilotus albus
17	Sheppards Purse	Capsella bursa-pastoris
17	Plantain	Plantago major
17	Chickweed	Stellaria media
17	jewelweed	Impatiens pallida
17	White Avens	Geum canadense
17	Common mouseear chickweed	Cerastium fontanum
18	Dandelion	Taraxacum officinale
18	Viola Sp1	Viola papillionesa
18	Clover- Small	Melilotus albus
18	Sheppards Purse	Capsella bursa-pastoris
18	Daisy	Leucanthemum vulgare
18	Lambs quarters	Chenopodium album
19	Dandelion	Taraxacum officinale
19	Viola Sp1	Viola papillionesa
19	Creeping Charlie	Glechoma hederacea
19	Clover- Small	Melilotus albus
19	Viola Sp.2	Viola pubescence
19	Clover-Large	Melilotus officinalis
19	Praire Fleabane	Erigeron strigosus
20	Dandelion	Taraxacum officinale
20	viola Sp1	Viola papillionesa
20	Hepatica Round Lobed	Anemone americana
20	Canada Thistle	Cirsium arvense
20	Clover-Large	Melilotus officinalis
20	Sheppards Purse	Capsella bursa-pastoris
20	Lily of the valley	Convallaria majalis
20	Plantain	Plantago major
21	Dandelion	Taraxacum officinale
21	viola Sp1	Viola papillionesa
21	Creeping Charlie	Glechoma hederacea
21	Lambs ear	Stachys byzantina
21	Sheppards Purse	Capsella bursa-pastoris
21	Canada Thistle	Cirsium arvense
21	Clover-Large	Melilotus officinalis
22	Dandelion	Taraxacum officinale
22	Viola Sp1	Viola papillionesa
22	Sheppards Purse	Capsella bursa-pastoris
22	Aster Sp	Aster sp.
22	Clover-Large	Melilotus officinalis
23	Dandelion	Taraxacum officinale
23	Stiltgrass	Microstegium vimineum
23	Sheppards Purse	Capsella bursa-pastoris
24	Dandelion	Taraxacum officinale
24	Viola Sp1	Viola papillionesa
24	Clover- Small	Melilotus albus
25	Dandelion	Taraxacum officinale
25	Plantain	Plantago major
25	Clover- Small	Melilotus albus
25	Clover-Large	Melilotus officinalis
25	Canada Thistle	Cirsium arvense
26	Dandelion	Taraxacum officinale
26	Viola Sp1	Viola papillionesa
26	Clover-Large	Melilotus officinalis
26	Plantain	Plantago major
26	Sheppards Purse	Capsella bursa-pastoris
27	Dandelion	Taraxacum officinale
27	Viola Sp1	Viola papillionesa
27	Creeping Charlie	Glechoma hederacea
27	Sheppards Purse	Capsella bursa-pastoris
27	Canada Thistle	Cirsium arvense
27	Clover-Large	Melilotus officinalis
27	Curly Dock	Rumex crispus
28	Clover- Small	Melilotus albus
28	Plantain	Plantago major
29	Dandelion	Taraxacum officinale
29	Viola Sp1	Viola papillionesa
29	Clover-Large	Melilotus officinalis
29	Clover- Small	Melilotus albus
29	Plantain	Plantago major
30	Dandelion	Taraxacum officinale
30	Viola Sp1	Viola papillionesa
30	Creeping Charlie	Glechoma hederacea
30	Clover-Large	Melilotus officinalis
30	Canada Thistle	Cirsium arvense
30	Viola Sp.2	Viola pubescence
30	Lambs quarters	Chenopodium album
30	Lambs ear	Stachys byzantina
31	Dandelion	Taraxacum officinale
31	Viola Sp1	Viola papillionesa
31	Creeping Charlie	Glechoma hederacea
31	Whorled aster	Aster sp.
31	curly Dock	Rumex crispus
31	Annual Fleabane	Erigeron annuus
31	common selfheal	Prunella vulgaris
31	Plantain	Plantago major
32	Dandelion	Taraxacum officinale
32	Viola Sp1	Viola papillionesa
32	Clover- Small	Melilotus albus
32	Clover-Large	Melilotus officinalis
32	Sheppards Purse	Capsella bursa-pastoris
32	Viola Sp.2	Viola pubescence
32	Plantain	Plantago major
32	Daisy	Leucanthemum vulgare
32	Chickweed	Stellaria media
32	White Avens	Geum canadense
32	Common mouseear chickweed	Cerastium fontanum
32	White Daisy	Leucanthemum vulgare
33	Dandelion	Taraxacum officinale
33	Clover white	Trifolium repens
33	Yellow Clover	Melilotus officinalis
33	Canada Thistle	Cirsium arvense
33	Curly Dock	Rumex crispus
33	PLantain	Plantago major
33	Lambs quarters	Chenopodium album
33	Prickly Lettuce	Lactuca serriola
33	Daisy	Leucanthemum vulgare
33	Sheppards Purse	Capsella bursa-pastoris
33	Canada Goldenrod	Solidago altisima
34	Dandelion	Taraxacum officinale
34	Plantain	Plantago major
34	Field Pennycress	Thlaspi arvense
34	Sheppards Purse	Capsella bursa-pastoris
35	Yellow Clover	Melilotus officinalis
35	Dandelion	Taraxacum officinale
35	White Clover	Trifolium repens
35	Plantain	Plantago major
33	Bull Thistle	Cirsium vulgare

## Sheet: Bees
Address	Andrena crataegi	Andrena cressoni	Andrena miranda	Andrena wilkea	Apis mellifera	Bombus impatiens	Bombus rufocinctus	Bombus vagans	Ceratina calcarata	Melissodes bimaculatus	Melissodes denticulatus	Melissodes desponsus	Melissodes druinellus	Melissodes rustica	Nomada cressoni	Agapostemon virescens	Augochorella aurata	Augochorella pura	Halictus ligatus	Halictus rubicundus	Hoplitis pilosifrons	Hylaeus modestus	Hyleaus mesillae	Lasioglossum coriaceum	Lasioglossum cressonii	Lasioglossum laevissimum	Lasioglossum pilosum	Lasioglossum zephyrum	Megachile campunulae	Osmia pumila	Sphecodes spp.	Anthidium	Sphecodes
1			1		3										3										3
2					1															1						2	1			1
3					2	1		1	1				1			2		1
4	1			1		2				1											1		2		4
5						1		1							1										4
6	1												1																		1
7													1												1
8																									3
9					1	2			2						1						1									1
10																					1				2
11						1		2	1	1		1						1	1		2				3
12										1				1											2
13	1				1										1	1								2	3
14	1				1	1								1							1				1
15																					1				1
16								1													1			1	2
17	2				3	2												2	1					2	3	2					1
18					1														2		2				3
19	2							1		1											1				3	1
20	1	1				1		1		1					1		2				2	1			6
21		1				1				1						1			2			1			11
22																					3				1
23																										1
24																					1
25																		1							2
26	1																								3
27	1	3				1				3	2					3		1			5				8			1	1
28																					1				1
29						1				2											4				4
30					2	1	1			2											2				4					1
31		2	1		2																		1		4
32			2		1	2				1							1				2				3
33	1									2															12							1	1
34		1								2											3				11
35		3	2							1						3		1							12			2		1
	12	11	6	1	18	17	1	7	4	19	2	1	3	2	7	10	3	7	6	1	34	2	3	5	120	6	1	3	1	4	2	1	1
