# Supplementary material for: No Mow May lawns have higher pollinator richness and abundances: An engaged community provides floral resources for pollinators
Source: PubMed Central journal article supplement (PMC7518183; doi:10.7717/peerj.10021), 2020-09-22
Supplement: peerj-08-10021-s004.pdf [file peerj-08-10021-s004.pdf]

## Post-No-Mow-Survey and Grass Clipping Pickup

Thank you for taking the time to help our pollinators this month! Nearly 500 homes around the city registered as participants of NoMowMay! Our neighborhood pollinators and Pollenablers thank you! Please take this quick 5 minute survey to let us know how this month went!

---

What will you do with your grass clippings?

- I plan to compost at home.
  - I'm bagging it in a paper bag and setting it out for pick up.
  - I'm taking it into the Appleton Green Waste Site (\$4/bag).
- 

### **As a result of No Mow May:**

How will your mowing practices change?

- I plan to mow only when my lawn gets to a height of 8 inches.
- I plan to reduce my mowing frequency to once a month.
- I plan to reduce my mowing frequency to twice a month.
- I plan to continue mowing weekly but at a higher deck setting.

Did you see pollinators in your yard this year?

- Yes, this year there were clearly more pollinators in my yard than normal.
- I saw a few more pollinators.
- I did not notice any difference in the number of pollinators in my yard.
- I saw fewer pollinators than normal.

Did you see more flowers in your yard this year?

- Yes, this year there were clearly more flowers in my yard than normal.
  - I saw a few more flowers.
  - I did not notice any difference in the number of flowers in my yard.
  - I saw fewer flowers than normal.
- 

### **Beyond #NoMowMay:**

What other activities will you do throughout the year to help your backyard pollinators?

- I will reduce or eliminate herbicide and/or pesticide use.
  - I will reduce or eliminate fertilizer use.
  - I will sow a no-mow or low-mow lawn.
  - I will replace some of my lawn with native wildflower alternatives.
  - I will replace some of my lawn with garden beds.
  - I will increase pollinator nesting habitat in my yard.
  - I will talk with my neighbors about pollinator friendly practices.
-

**Tell us about your experience!**

Do you think you'll participate again in future years?

- Yes
- No
- Maybe

How did it go for you? What could we do next year to improve the program?

Do you think this this initiative had an impact on our community? On our biodiversity?

**IRB Statement**

Your project is approved as minimal risk research that follows the basic ethical standards of human participant research, including informed consent, non-coercion, confidentiality, and respect for participants. If deception is used, participants will be debriefed. Informed consent will be obtained and participants will be given opportunities to withdraw if they wish.

Any further changes in the protocol, including procedures, population sampled, method of recruitment, or informed consent, must be reviewed by the IRB before those changes are implemented. Any additional information about potential risks to or adverse reactions by participants should be reported to the IRB.

On behalf of the IRB and the University, thank you for your efforts to conduct research in compliance with the federal regulations that have been established for the protection of human participants.
